# Supplementary material for: Molecular Insight into the Binding of Astilbin with Human Serum Albumin and Its Effect on Antioxidant Characteristics of Astilbin
Source: MDPI journal article supplement (doi:10.3390/molecules27144487), 2022-07-13
Supplement: s1 [file s1]

*Supplementary Materials*

# **Molecular Insight into the Binding of Astilbin with Human Serum Albumin and Its Effect on Antioxidant Characteristics of Astilbin**

**Xiangyu Han <sup>1,†</sup>, Jing Sun <sup>1,2,†</sup>, Tianmei Niu <sup>1,†</sup>, Beibei Mao <sup>1</sup>, Shijie Gao <sup>3</sup>, Pan Zhao <sup>1,\*</sup> and Linlin Sun <sup>1,3,\*</sup>**

<sup>1</sup> College of Pharmacy, Shandong University of Traditional Chinese Medicine, Jinan 250355, China;

hanxiangyujiayou@163.com (X.H.); 13065016960@163.com (J.S.); niutianmei123@163.com (T.N.); maobeibei89@163.com (B.M.)

<sup>2</sup> School of Chinese Materia Medica, Beijing University of Chinese Medicine, Beijing 100029, China

<sup>3</sup> Experimental Center, Shandong University of Traditional Chinese Medicine, Jinan 250355, China; gsj77@126.com

\* Correspondence: 60030080@sdutcm.edu.cn (P.Z.); 60011923@sdutcm.edu.cn (L.S.)

† These authors contributed equally to this work.

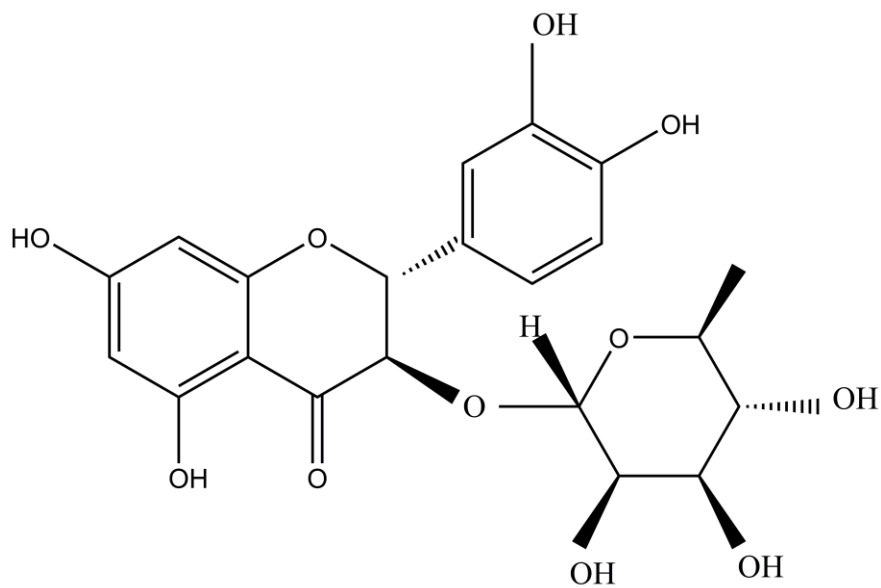

Figure S1. The Chemical structure of astilbin.

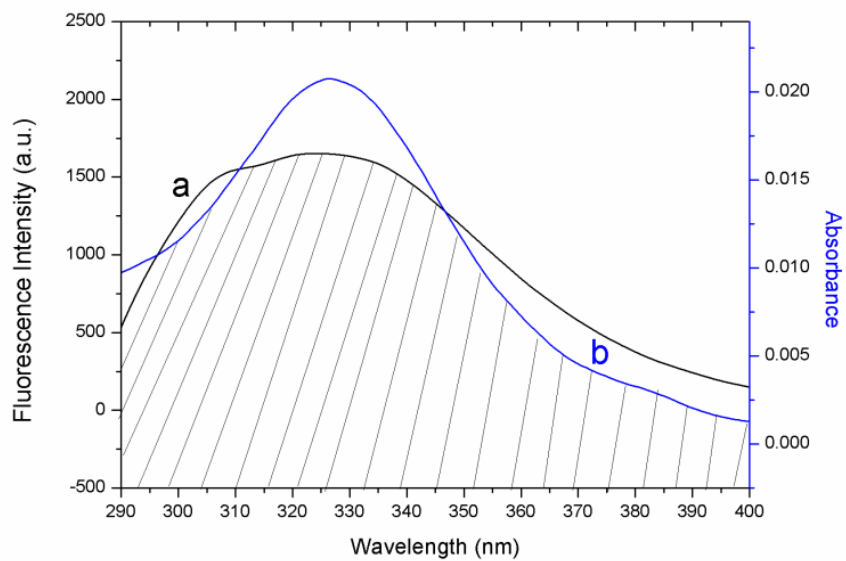

Figure S2: Overlap of the fluorescence emission spectrum of HSA with the UV-Vis absorption of astilbin. (a) is the fluorescence emission spectrum of HSA,  $C_{\text{HSA}} = 2.5 \times 10^{-6} \text{ mol} \cdot \text{L}^{-1}$ ; (b) is the UV-Vis absorption of astilbin, the  $C_{\text{HSA}} = 2.5 \times 10^{-6} \text{ mol} \cdot \text{L}^{-1}$ .

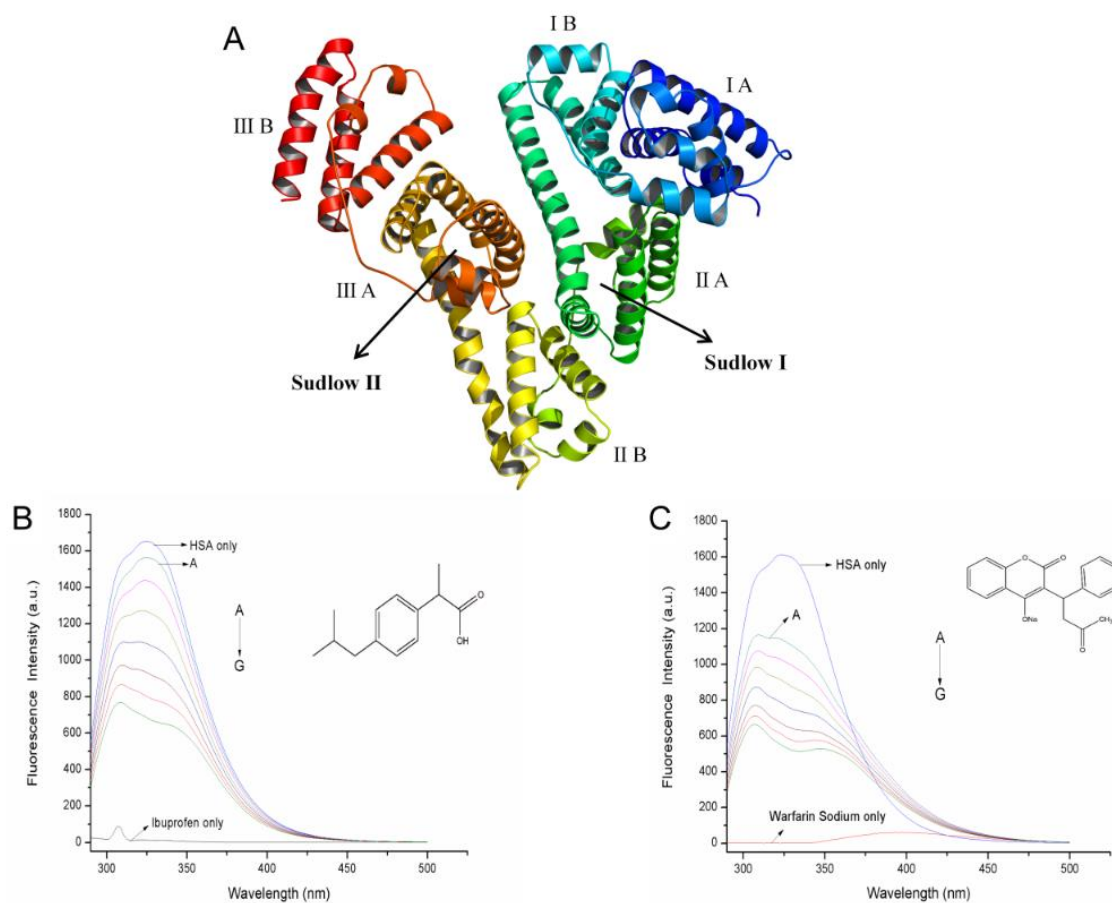

Figure S3: **A**: Structure of HSA showing the subdomains; **B–C**: Effects of different site competitors on HSA–astilbin complex;  $C_{\text{HSA}} = C_{\text{Warfarin sodium}} = C_{\text{Ibuprofen}} = 2.5 \times 10^{-6} \text{ mol} \cdot \text{L}^{-1}$ ;  $C_{\text{astilbin}}(\text{A} \rightarrow \text{G})$ : 0, 1.25, 2.5, 5, 7.5, 10,  $12.5 \times 10^{-6} \text{ mol} \cdot \text{L}^{-1}$ . Temperature was 298 K. pH was 7.4 (Tris-HCl)

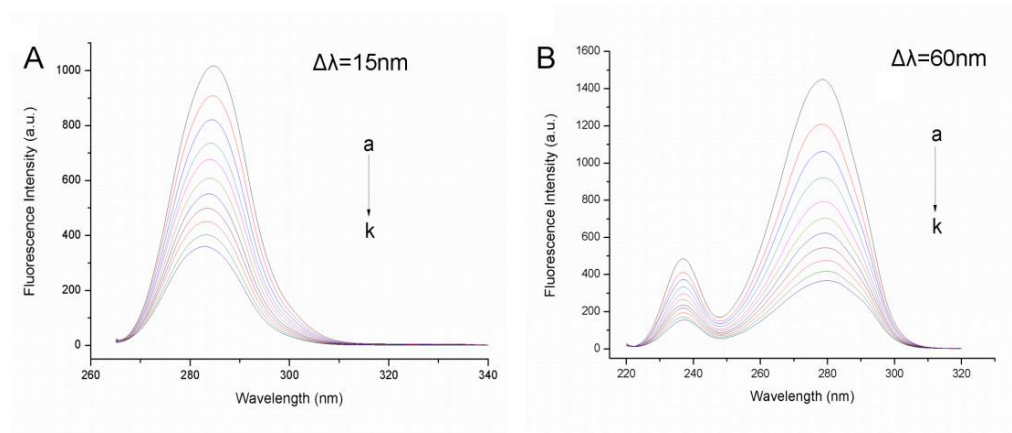

Figure S4: **A:** Synchronous fluorescence spectra of astilbin with HSA. ( $\Delta\lambda = 15\text{ nm}$ );

**B:** Synchronous fluorescence spectra of astilbin with HSA. ( $\Delta\lambda = 60\text{ nm}$ );
